# Supplementary material for: Mutations Disrupting Histone Methylation Have Different Effects on Replication Timing in S. pombe Centromere
Source: PubMed Central journal article supplement (PMC3641051; doi:10.1371/journal.pone.0061464), 2013-05-01
Supplement: pone.0061464.s005.pdf [file pone.0061464.s005.pdf]

Table S1. Strains list.

| Strain Number | Genotype                                                                                                                                             | Source          |
|---------------|------------------------------------------------------------------------------------------------------------------------------------------------------|-----------------|
| FY2318        | <i>h+ cdc10-V50 leu1-32::hENT1-leu1+(pJAH29) his7-366::hsv-tk-his7+(pJAH31) ade6-M216 ura4-D18</i>                                                   | Li et al., 2011 |
| FY3665        | <i>h90 swi6Δ::his1+ sad1+::DsRed-LEU2+ leu1::[Leu+nmt-GFP-swi6] lys1</i>                                                                             | This study      |
| FY3812        | <i>h+ cdc10-V50 swi6Δ::ura4+ leu1-32::hENT1-leu1+(pJAH29) his7-366::hsv-tk-his7+(pJAH31) ade6-M216 ura4-D18</i>                                      | Li et al., 2011 |
| FY4223        | <i>h- rdp1Δ::natR leu1::hENT-Leu1+ his7-366::hsv-tk-his7+ uraD18 i mr1R::ura4+ oril</i>                                                              | This study      |
| FY4224        | <i>h- hrr1Δ::natR leu1::hENT-Leu1+ his7-366::hsv-tk-his7+ ade6-M216 ura4D18</i>                                                                      | This study      |
| FY4228        | <i>h- dcr1Δ::natR leu1::hENT-Leu1+ his7-366::hsv-tk-his7+ ade6-M216 ura4D18</i>                                                                      | This study      |
| FY 4229       | <i>h? ura4-D18 CFP-cnp1::kanMX rad22:YFP-kanMX sad1::DsRed-Leu2+</i>                                                                                 | This study      |
| FY4255        | <i>h- cdc25-22 leu1::hENT-Leu1+ his7-366::hsv-tk-his7+ ura4? ade6-M210</i>                                                                           | This study      |
| FY4487        | <i>h- cdc25-22 mrc1Δ::ura4+ leu1-32::hENT1-leu1+(pJAH29) his7-366::hsv-tk-his7+(pJAH31) ura4-D18 ade6-M210</i>                                       | This study      |
| FY4488        | <i>h- cdc25-22 mrc1Δ::ura4+ leu1-32::hENT1-leu1+(pJAH29) his7-366::hsv-tk-his7+(pJAH31) rad11myc::KanMX ura4-D18 ade6-M210 (rad11=ssb1)</i>          | This study      |
| FY4548        | <i>h+ cdc25-22 polα-FLAG2::ura4+ ade6-M216 ura4-D18 leu1-32::[hENT leu1+] his7-366::[hsv-tk his7+]</i>                                               | This study      |
| FY4574        | <i>h+ cdc25-22 swi6Δ::kanMX leu1-32::hENT1-leu1+(pJAH29) his7-366::hsv-tk-his7+(pJAH31) ura4-D18 ade6-M210 his3-D1?</i>                              | This study      |
| FY4664        | <i>h? cdc25-22 clr4Δ::ura4+ leu1-32::hENT1-leu1+(pJAH29) his7-366::hsv-tk-his7+(pJAH31) (rad11myc::KanMX)? ura4-D18 ade6-M216/M210? (rad11=ssb1)</i> | This study      |
| FY4710        | <i>h+ cdc25-22 chp1Δ::kanMX6-Bioneer leu1::hENT-Leu1+ his7-366::hsv-tk-his7+ ura4? ade6-M210</i>                                                     | This study      |
| FY5321        | <i>h+ cdc25-22 swi6Δ::kanMX polα-FLAG2::ura4+ ade6-M210 leu1::[hENT leu1+] his7-366::[hsv-tk his7+] ura4-D18</i>                                     | This study      |
| FY5911        | <i>h+ chp1::chp1-eGFP-KanMX sad1+::DsRed-LEU2 leu1-32 ura4-D18 ade6-M210/216 can1-1?</i>                                                             | This study      |
