# Supplementary material for: Mutations Disrupting Histone Methylation Have Different Effects on Replication Timing in S. pombe Centromere
Source: PubMed Central journal article supplement (PMC3641051; doi:10.1371/journal.pone.0061464), 2013-05-01
Supplement: pone.0061464.s006.pdf [file pone.0061464.s006.pdf]

Table S2. Primers list.

| Primer number | Sequence                 | Source                                     |
|---------------|--------------------------|--------------------------------------------|
| 875           | CGAACAAACAGGCTTGGTTAGAA  | Hayashi et al., Gen Dev (2007) 26: 1327-39 |
| 876           | GAAGTACGGACTTGTTTCGATTCC | Hayashi et al., Gen Dev (2007) 26: 1327-39 |
| 879           | GGTTTTATGATTTTGGCGAAGTG  | Hayashi et al., Gen Dev (2007) 26: 1327-39 |
| 880           | CGACAAGCGTGGATTTATTTTATG | Hayashi et al., Gen Dev (2007) 26: 1327-39 |
| 1033          | GTAAGTATGAGCAACTGGCG     | Gomez et al., MCB (2005) 20: 8887-903      |
| 1034          | GGAACAAATCAGGAAACCGAG    | Gomez et al., MCB (2005) 20: 8887-903      |
| 1183          | CCATATCAATTTCCCATGTTCC   | Kloc et al., Curr Biol (2008) 28: 490-5    |
| 1184          | CATCAAGCGAGTCGAGATGA     | Kloc et al., Curr Biol (2008) 28: 490-5    |
| 1257          | CGGATCCGTAATCCCAACAA     | Nitani et al, PNAS (2008) 105: 12973-8     |
| 1258          | TTTGCTTACATTTTCGGGAECTTA | Nitani et al, PNAS (2008) 105: 12973-8     |
| 1263          | GTTACAATGGTTTCCAACTTTTAG | Nitani et al, PNAS (2008) 105: 12973-8     |
| 1264          | CATCGATTATTGTTTGCACGTT   | Nitani et al, PNAS (2008) 105: 12973-8     |
| 1265          | AAATATGGCGATCCAGGAGATG   | Nitani et al, PNAS (2008) 105: 12973-8     |
| 1266          | GCTTAACGTGCGCACAGACA     | Nitani et al, PNAS (2008) 105: 12973-8     |
| 1536          | TTTTCAGCGAGACATGTACC     | Gomez et al., MCB (2005) 20: 8887-903      |
| 1537          | TCATAAAGCAACACTGGGTG     | Gomez et al., MCB (2005) 20: 8887-903      |
| 1624          | AGAGCATGGTGGTGGTTATGG    | PNAS (2009) 106: 1163-1168.                |
| 1625          | TTTGGCGACTAAACCGAAAGC    | PNAS (2009) 106: 1163-1168.                |
| 1628          | CCGCAGTTGGGAGTACATCATTC  | PNAS (2009) 106: 1163-1168.                |
| 1629          | ACAGCACTCAACAACAGTCTTGG  | PNAS (2009) 106: 1163-1168.                |
